# Supplementary material for: Pembrolizumab versus paclitaxel for previously treated PD-L1-positive advanced gastric or gastroesophageal junction cancer: 2-year update of the randomized phase 3 KEYNOTE-061 trial
Source: PubMed Central journal article supplement (PMC8732941; doi:10.1007/s10120-021-01227-z), 2021-09-01

*Gastric Cancer*

**Pembrolizumab versus paclitaxel for previously treated PD-L1–positive advanced gastric or gastroesophageal junction cancer: 2-year update of the randomized phase 3 KEYNOTE-061 trial**

Charles S. Fuchs,\* Mustafa Özgüroğlu, Yung-Jue Bang, Maria Di Bartolomeo, Mario Mandala, Min-Hee Ryu, Lorenzo Fornaro, Tomasz Olesinski, Christian Caglevic, Hyun C. Chung, Kei Muro, Eric Van Cutsem, Anneli Elme, Peter Thuss-Patience, Ian Chau, Atsushi Ohtsu, Pooja Bhagia, Anran Wang, Chie-Schin Shih, Kohei Shitara

\*Corresponding author

Yale Cancer Center, Smilow Cancer Hospital

Email: [Charles.S.Fuchs@gmail.com](mailto:Charles.S.Fuchs@gmail.com)

**Online Resource 1. Baseline characteristics in the PD-L1 CPS <1, CPS ≥5, and CPS ≥10 populations**

|                                              | Patients with PD-L1 CPS <1     |                             | Patients with PD-L1 CPS ≥5     |                             | Patients with PD-L1 CPS ≥10    |                             |
|----------------------------------------------|--------------------------------|-----------------------------|--------------------------------|-----------------------------|--------------------------------|-----------------------------|
|                                              | Pembrolizumab<br><i>n</i> = 99 | Paclitaxel<br><i>n</i> = 96 | Pembrolizumab<br><i>n</i> = 95 | Paclitaxel<br><i>n</i> = 91 | Pembrolizumab<br><i>n</i> = 53 | Paclitaxel<br><i>n</i> = 55 |
| Age, median (range), years                   | 59.0 (27-79)                   | 59.0 (20-83)                | 64.0 (35-80)                   | 59.0 (24-81)                | 66.0 (35-79)                   | 60 (37-76)                  |
| Men, <i>n</i> (%)                            | 55 (55.6)                      | 68 (70.8)                   | 66 (69.5)                      | 61 (67.0)                   | 35 (66.0)                      | 35 (63.6)                   |
| Region, <i>n</i> (%)                         |                                |                             |                                |                             |                                |                             |
| Europe, Israel, North America, and Australia | 59 (59.6)                      | 55 (57.3)                   | 64 (67.4)                      | 61 (67.0)                   | 32 (60.4)                      | 35 (63.6)                   |
| Asia                                         | 35 (35.4)                      | 36 (37.5)                   | 25 (26.3)                      | 21 (23.1)                   | 16 (30.2)                      | 13 (23.6)                   |
| Rest of world                                | 5 (5.1)                        | 5 (5.2)                     | 6 (6.3)                        | 9 (9.9)                     | 5 (9.4)                        | 7 (12.7)                    |
| ECOG PS, <i>n</i> (%)                        |                                |                             |                                |                             |                                |                             |
| 0                                            | 39 (39.4)                      | 45 (46.9)                   | 44 (46.3)                      | 40 (44.0)                   | 24 (45.3)                      | 24 (43.6)                   |
| 1                                            | 60 (60.6)                      | 51 (53.1)                   | 51 (53.7)                      | 51 (56.0)                   | 29 (54.7)                      | 31 (56.4)                   |
| Histology, <i>n</i> (%)                      |                                |                             |                                |                             |                                |                             |
| Adenocarcinoma                               | 76 (76.8)                      | 74 (77.1)                   | 78 (82.1)                      | 70 (76.9)                   | 44 (83.0)                      | 43 (78.2)                   |
| Tubular adenocarcinoma                       | 8 (8.1)                        | 7 (7.3)                     | 4 (4.2)                        | 13 (14.3)                   | 2 (3.8)                        | 8 (14.5)                    |

|                                          |           |           |           |           |           |           |
|------------------------------------------|-----------|-----------|-----------|-----------|-----------|-----------|
| Signet-ring cell carcinoma, diffuse type | 9 (9.1)   | 7 (7.3)   | 1 (1.1)   | 1 (1.1)   | 0         | 1 (1.8)   |
| Other                                    | 6 (6.1)   | 8 (8.3)   | 12 (12.6) | 7 (7.7)   | 7 (13.2)  | 3 (5.5)   |
| Histologic subtype, <i>n</i> (%)         |           |           |           |           |           |           |
| Diffuse                                  | 34 (34.3) | 24 (25.0) | 31 (32.6) | 20 (22.0) | 17 (32.1) | 10 (18.2) |
| Intestinal                               | 14 (14.1) | 25 (26.0) | 14 (14.7) | 19 (20.9) | 6 (11.3)  | 11 (20.0) |
| Mixed                                    | 1 (1.0)   | 3 (3.1)   | 6 (6.3)   | 1 (1.1)   | 4 (7.5)   | 1 (1.8)   |
| Unknown                                  | 0         | 0         | 44 (46.3) | 51 (56.0) | 26 (49.1) | 33 (60.0) |
| Primary location, <i>n</i> (%)           |           |           |           |           |           |           |
| Stomach                                  | 72 (72.7) | 73 (76.0) | 69 (72.6) | 60 (65.9) | 35 (66.0) | 35 (63.6) |
| GEJ                                      | 27 (27.3) | 23 (24.0) | 26 (27.4) | 31 (34.1) | 18 (34.0) | 20 (36.4) |
| Previous gastrectomy, <i>n</i> (%)       |           |           |           |           |           |           |
| Total                                    | 15 (15.2) | 19 (19.8) | 20 (21.1) | 16 (17.6) | 14 (26.4) | 7 (12.7)  |
| Subtotal                                 | 12 (12.1) | 15 (15.6) | 13 (13.7) | 15 (16.5) | 8 (15.1)  | 12 (21.8) |
| Partial                                  | 12 (12.1) | 6 (6.3)   | 9 (9.5)   | 5 (5.5)   | 4 (7.5)   | 4 (7.3)   |
| None                                     | 60 (60.6) | 56 (58.3) | 53 (55.8) | 55 (60.4) | 27 (50.9) | 32 (58.2) |
| TTP on first-line therapy, <i>n</i> (%)  |           |           |           |           |           |           |
| <6 months                                | 60 (60.6) | 53 (55.2) | 62 (65.3) | 57 (62.6) | 36 (67.9) | 36 (65.5) |

|                                     |           |           |           |           |           |           |
|-------------------------------------|-----------|-----------|-----------|-----------|-----------|-----------|
| ≥6 months                           | 39 (39.4) | 43 (44.8) | 33 (34.7) | 34 (37.4) | 17 (32.1) | 19 (34.5) |
| HER2 positive, <i>n</i> (%)         | 12 (12.1) | 21 (21.9) | 19 (20.0) | 15 (16.5) | 10 (18.9) | 9 (16.4)  |
| Current disease stage, <i>n</i> (%) |           |           |           |           |           |           |
| Metastatic                          | 99 (100)  | 95 (99.0) | 95 (100)  | 90 (98.9) | 53 (100)  | 55 (100)  |
| Locally advanced                    | 0         | 1 (1.0)   | 0         | 1 (1.1)   | 0         | 0         |
| Peritoneal metastasis, <i>n</i> (%) | 31 (31.3) | 35 (36.5) | 26 (27.4) | 23 (25.3) | 11 (20.8) | 14 (25.5) |
| Presence of ascites, <i>n</i> (%)   | 27 (27.3) | 17 (17.7) | 10 (10.5) | 8 (8.8)   | 6 (11.3)  | 7 (12.7)  |
| MSI status, <i>n</i> (%)            |           |           |           |           |           |           |
| MSI-H                               | 2 (2.0)   | 1 (1.0)   | 9 (9.5)   | 6 (6.6)   | 8 (15.1)  | 5 (9.1)   |
| Non-MSI-H                           | 82 (82.8) | 78 (81.2) | 79 (83.2) | 76 (83.5) | 41 (77.4) | 44 (80.0) |
| Unknown                             | 15 (15.2) | 17 (17.7) | 7 (7.4)   | 9 (9.9)   | 4 (7.5)   | 6 (10.9)  |

CPS, combined positive score; ECOG PS, Eastern Cooperative Oncology Group performance status; GEJ, gastroesophageal junction; HER2, human epidermal growth factor receptor 2; TTP, time to progression.

## Online Resource 2. Overall survival analysis by subgroups in the overall population

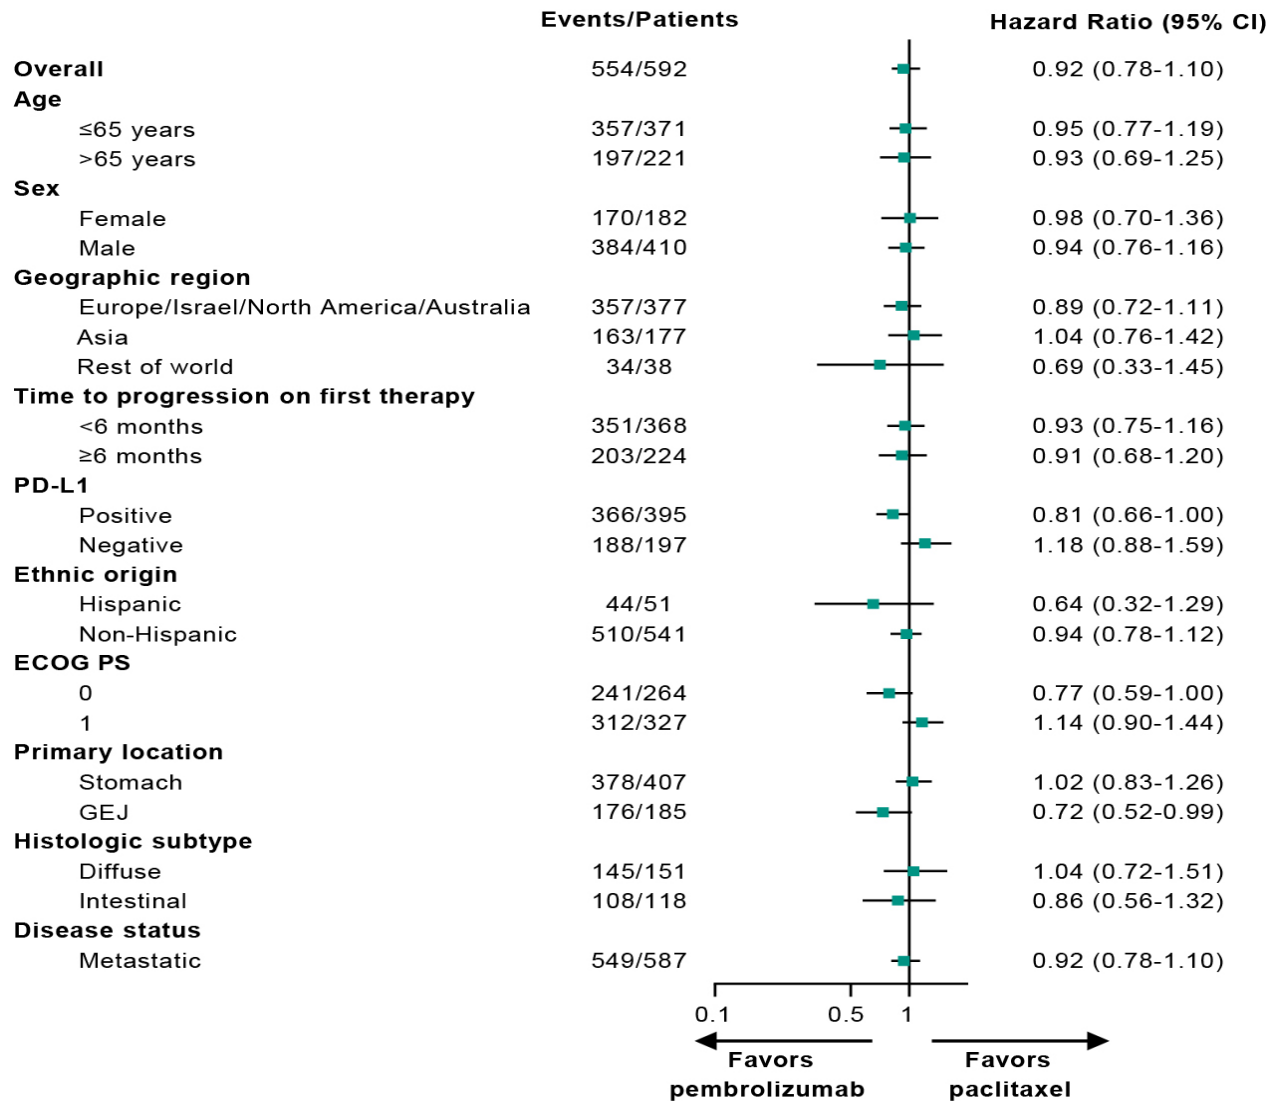

Supplement: 10120_2021_1227_MOESM1_ESM.pdf [file 10120_2021_1227_MOESM1_ESM.pdf]
